# Supplementary material for: Chloromethyl chlorosulfate: a new, catalytic method of preparation and reactions with some nucleophiles
Source: Royal Society of Chemistry journal article supplement (doi:10.1039/b403338h), 2004-01-01
Supplement: b403338h.pdf [file b403338h.pdf]

SUPPLEMENTARY INFORMATION

Table S1: Reaction of CMCS with tetrabutylammonium chloride and bromide in CD<sub>3</sub>CN at 25 °C

| Nucleophile Conc./M  | t/min | [CMCS]/M   | [CH <sub>2</sub> Cl <sub>2</sub> ]/M | [CH <sub>2</sub> CIBr]/M |
|----------------------|-------|------------|--------------------------------------|--------------------------|
|                      |       | $\delta_H$ | 6.13                                 | 5.44                     |
|                      |       |            | 5.44                                 | 5.31                     |
| Cl <sup>-</sup>      | 0     | 0.300      | 0                                    | -                        |
|                      | 10    | 0.211      | 0.086                                | -                        |
|                      | 50    | 0.203      | 0.089                                | -                        |
|                      | 135   | 0.190      | 0.109                                | -                        |
|                      | 3120  | 0.179      | 0.118                                | -                        |
| Br <sup>-</sup>      | 0     | 0.300      | 0                                    | 0                        |
|                      | 10    | 0.233      | 0.012                                | 0.056                    |
|                      | 100   | 0.214      | 0.021                                | 0.064                    |
|                      | 975   | 0.200      | 0.030                                | 0.070                    |
|                      | 3120  | 0.182      | 0.042                                | 0.077                    |
| Br <sup>-</sup>      | 0     | 0.300      | 0                                    | 0                        |
|                      | 10    | 0.133      | 0.026                                | 0.121                    |
| Br <sup>-</sup>      | 0     | 0.300      | 0                                    | 0                        |
|                      | 10    | 0.071      | 0.027                                | 0.155                    |
| I <sup>-</sup> 0.075 | 0     | 0.300      | 0                                    | 0 <sup>a</sup>           |
|                      | 10    | 0.113      | 0                                    | 0 <sup>a</sup>           |
|                      | 2400  | 0.076      | 0.027                                | 0 <sup>a</sup>           |

|                                                    |      |       |       |                    |
|----------------------------------------------------|------|-------|-------|--------------------|
| CH <sub>3</sub> CO <sub>2</sub> <sup>-</sup> 0.075 | 0    | 0.300 | 0     | 0 <sup>b</sup>     |
|                                                    | 10   | 0.185 | 0.060 | 0.048 <sup>b</sup> |
| Cl <sup>-</sup> + Br <sup>-</sup> 0.0375 each      | 0    | 0.300 | 0     | 0                  |
|                                                    | 10   | 0.226 | 0.038 | 0.025              |
|                                                    | 95   | 0.188 | 0.068 | 0.039              |
|                                                    | 1560 | 0.176 | 0.076 | 0.039              |
| Cl <sup>-</sup> + Br <sup>-</sup> 0.075 each       | 0    | 0.300 | 0     | 0                  |
|                                                    | 10   | 0.151 | 0.097 | 0.056              |

---

*a* Chloroiodomethane

*b* Chloromethyl acetate: δ<sub>H</sub> = 2.09, 5.71

**Table S2: Reaction of MCS with tetrabutylammonium chloride, bromide, iodide and acetate in CD<sub>3</sub>CN at 25 °C**

| Time/min.  | <u>Chloride (0.150 M)</u> |                    | <u>Bromide (0.150 M)</u> |       | <u>Iodide (0.150 M)</u> |       | <u>Acetate (0.150 M)</u> |       |       |       |                                   |
|------------|---------------------------|--------------------|--------------------------|-------|-------------------------|-------|--------------------------|-------|-------|-------|-----------------------------------|
|            | MCS                       | MeCl               | MCS                      | MeCl  | MeBr                    | MCS   | MeCl                     | MeI   | MCS   | MeCl  | MeO <sub>2</sub> CCH <sub>3</sub> |
| $\delta_H$ | 4.23                      | 3.02               |                          |       | 2.67                    |       |                          | 2.16  |       |       | 3.58, 1.97                        |
| 0          | 0.300                     | 0                  | 0.300                    | 0     | 0                       | 0.300 | 0                        | 0     | 0.300 | 0     | 0                                 |
| 5          | 0.083                     | 0.129              | 0.083                    | 0.015 | 0.111                   | 0.099 | 0.020                    | 0.109 | 0.111 | 0.040 | 0.055                             |
| 40         | 0.064 <sup>a</sup>        | 0.130 <sup>a</sup> | 0.084                    | 0.016 | 0.131                   | 0.077 | 0.021                    | 0.110 |       |       |                                   |
| 70         | 0.057 <sup>a</sup>        | 0.135 <sup>a</sup> | 0.074                    | 0.016 | 0.118                   | 0.069 | 0.025                    | 0.113 |       |       |                                   |
| 110        | 0.054 <sup>a</sup>        | 0.136 <sup>a</sup> | 0.069                    | 0.018 | 0.125                   | 0.064 | 0.027                    | 0.119 |       |       |                                   |
| 990        | 0.013                     | 0.155              | 0.014                    | 0.019 | 0.127                   | 0.013 | 0.030                    | 0.127 | 0.008 | 0.045 | 0.076                             |

<sup>a</sup> Interpolated from measurements at other times

**Table S3: Products (M) of reaction of CMCS with sodium potassium bromide and sodium acetate in CDCl<sub>3</sub>/H<sub>2</sub>O containing tetraoctylammonium bromide at 25°C**

| M <sup>+</sup> X <sup>-</sup> / % | 50      |                                    |                       | 100    |                                    |                       | 200     |                                    |                       |
|-----------------------------------|---------|------------------------------------|-----------------------|--------|------------------------------------|-----------------------|---------|------------------------------------|-----------------------|
|                                   | [CMCS]  | [CH <sub>2</sub> Cl <sub>2</sub> ] | [CH <sub>2</sub> CIX] | [CMCS] | [CH <sub>2</sub> Cl <sub>2</sub> ] | [CH <sub>2</sub> CIX] | [CMCS]  | [CH <sub>2</sub> Cl <sub>2</sub> ] | [CH <sub>2</sub> CIX] |
|                                   | δ5.97   | 5.30                               | 5.17 or 5.69          |        |                                    |                       |         |                                    |                       |
| <b>KBr</b>                        |         |                                    |                       |        |                                    |                       |         |                                    |                       |
| 0                                 | 0.300   | 0                                  | 0                     | 0.300  | 0                                  | 0                     | 0.300   | 0                                  | 0                     |
| 5                                 | 0.277   | 0.002                              | 0.016                 | 0.282  | 0.002                              | 0.022                 | 0.147   | 0.004                              | 0.147                 |
| 30                                |         |                                    |                       | 0.139  | 0.004                              | 0.129                 | 0.072   | 0.004                              | 0.234                 |
| 60                                | 0.132   | 0.018                              | 0.138                 | 0.065  | 0.004                              | 0.209                 | 0.012   | 0.004                              | 0.278                 |
| 120                               | 0.066   | 0.048                              | 0.154                 | 0.012  | 0.008                              | 0.242                 | 0       | 0.004                              | 0.290                 |
| 180                               | 0.015   | 0.076                              | 0.160                 | 0      | 0.009                              | 0.280                 |         |                                    |                       |
| <b>NaOAc<sup>a</sup></b>          |         |                                    |                       |        |                                    |                       |         |                                    |                       |
| 0                                 | 0.300   | 0                                  | 0                     | 0.300  | 0                                  | 0                     | 0.300   | 0                                  | 0                     |
|                                   | (0.300) | (0)                                | (0)                   |        |                                    |                       | (0.300) | (0)                                | (0)                   |
| 5                                 | 0.270   | 0                                  | 0.012 <sup>a</sup>    | 0.252  | 0.002                              | 0.020 <sup>a</sup>    | (0.283) | (0)                                | (0.017) <sup>a</sup>  |
| 30                                | 0.260   | 0.008                              | 0.016 <sup>a</sup>    | 0.234  | 0.012                              | 0.034 <sup>a</sup>    | 0.252   | 0.021                              | 0.029 <sup>a</sup>    |
| 60                                |         |                                    |                       | 0.217  | 0.027                              | 0.040 <sup>a</sup>    | (0.205) | (0.037)                            | (0.058) <sup>a</sup>  |
|                                   |         |                                    |                       |        |                                    |                       | 0.217   | 0.036                              | 0.056 <sup>a</sup>    |
| 120                               | 0.149   | 0.057                              | 0.027 <sup>a</sup>    | 0.167  | 0.080                              | 0.048 <sup>a</sup>    | (0.137) | (0.080)                            | (0.082) <sup>a</sup>  |
|                                   |         |                                    |                       |        |                                    |                       | 0.177   | 0.065                              | 0.069 <sup>a</sup>    |
| 240                               | 0.132   | 0.140                              | 0.026 <sup>a</sup>    | 0.080  | 0.160                              | 0.051 <sup>a</sup>    | (0.061) | (0.130)                            | (0.109) <sup>a</sup>  |
|                                   |         |                                    |                       |        |                                    |                       | 0.095   | 0.107                              | 0.087 <sup>a</sup>    |
|                                   |         |                                    |                       |        |                                    |                       | (0.005) | (0.167)                            | (0.127) <sup>a</sup>  |

<sup>a</sup> Figures in parentheses refer to experiments carried out in the presence of NaHCO<sub>3</sub> (0.9 M); the concentrations of the product CH<sub>2</sub>CIX refer to chloromethyl acetate (δ<sub>H</sub> = 5.69) containing in each case 0.015M CH<sub>2</sub>CIBr (δ<sub>H</sub> = 5.17) arising from the phase-transfer catalyst

**Table S4: Products (M) of reaction of MCS with potassium chloride, bromide and iodide and sodium acetate in CDCl<sub>3</sub>/H<sub>2</sub>O containing tetraoctylammonium bromide at 25 °C**

| Nucleophile <sup>a</sup> Compound( $\delta_H$ ) | Time/min    |       |       |       |       |       |
|-------------------------------------------------|-------------|-------|-------|-------|-------|-------|
|                                                 | 0           | 5     | 15    | 30    | 45    |       |
| KCl                                             | MCS (4.21)  | 0.300 | 0.242 | 0.092 | 0.032 | 0     |
|                                                 | MeCl (3.02) | 0     | 0.063 | 0.149 | 0.255 | 0.265 |
|                                                 | MeBr (2.65) | 0     | 0.012 | 0.015 | 0.016 | 0.013 |
| KBr                                             | MCS         | 0.300 | 0.186 |       | 0.005 | 0     |
|                                                 | MeCl        | 0     | 0.039 |       | 0.174 | 0.172 |
|                                                 | MeBr        | 0     | 0.063 |       | 0.081 | 0.080 |
| KI                                              | MCS         | 0.300 | 0.174 | 0.075 | 0.016 | 0     |
|                                                 | MeCl        | 0     | 0.044 | 0.136 | 0.188 | 0.171 |
|                                                 | MeBr        | 0     | 0.013 | 0.016 | 0.011 | 0.013 |
|                                                 | MeI (2.17)  | 0     | 0.073 | 0.084 | 0.079 | 0.081 |
| NaOAc                                           | MCS         | 0.300 | 0.241 | 0.146 | 0.036 | 0     |
|                                                 | MeCl        | 0     | 0.037 | 0.097 | 0.166 | 0.219 |
|                                                 | MeBr        | 0     | 0.013 | 0.018 | 0.019 | 0.015 |
